# Supplementary material for: Insight into Organization of Gliadin and Glutenin Extracted from Gluten Modified by Phenolic Acids
Source: MDPI journal article supplement (doi:10.3390/molecules28237790), 2023-11-27
Supplement: s1 [file s1]

## Supplementary Material

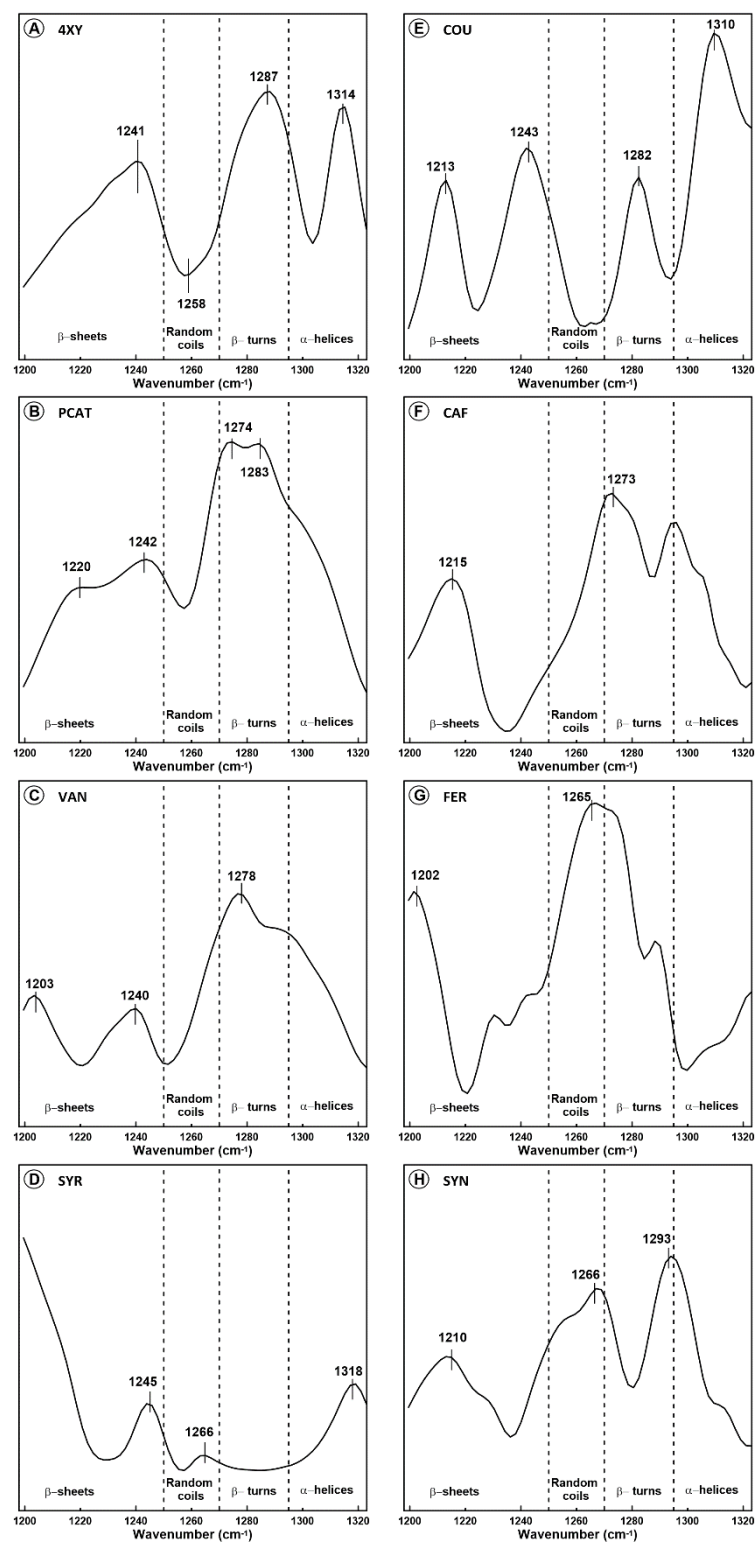

Figure S1 The spectra of pure phenolic acids detected in amide III region.
